# Supplementary material for: A New Insight into 6-Pentyl-2H-pyran-2-one against Peronophythora litchii via TOR Pathway
Source: MDPI journal article supplement (doi:10.3390/jof9080863), 2023-08-21
Supplement: s1 [file s1]

Table S1. List of primer pairs used in this study

| Primers                            | Sequence (5'-----3')                                                         | function                                                                                                                       |
|------------------------------------|------------------------------------------------------------------------------|--------------------------------------------------------------------------------------------------------------------------------|
| pGBKT7- <i>PIY</i><br><i>YI</i> -F | CGGAATTCATGATGTCGCTGCTCGCTC                                                  | pGBKT7- <i>PI</i><br><i>YYI</i><br>construct F<br>primer                                                                       |
| pGBKT7- <i>PIY</i><br><i>YI</i> -R | GGGATCCCTACACGTTCTTAGTGAGCTCGAAC                                             | pGBKT7- <i>PI</i><br><i>YYI</i><br>construct R<br>primer                                                                       |
| <i>PIYYI</i> -sg1F                 | CTAGCGCACACCTGATGAGTCCGTGAGGACG<br>AAACGAGTAAGCTCGTCGTGTGCGAGGAACC<br>CGGTTG | F primer of<br>sgRNA1                                                                                                          |
| <i>PIYYI</i> -sg1R                 | AAACCAACCGGGTTCCTCGCACACGACGAGC<br>TTACTCGTTTCGTCTCACGGACTCATCAGGT<br>GTGCG  | R primer of<br>sgRNA1                                                                                                          |
| <i>PIYYI</i> -sg2F                 | CTAGCGTGGTGCTGATGAGTCCGTGAGGACG<br>AAACGAGTAAGCTCGTCCACCACATCAAGATC<br>CACAC | F primer of<br>sgRNA2                                                                                                          |
| <i>PIYYI</i> -sg2R                 | AAACGTGTGGATCTTGATGTGGTGGACGAGCT<br>TACTCGTTTCGTCTCACGGACTCATCAGCAC<br>CACG  | R primer of<br>sgRNA2                                                                                                          |
| <i>PIYYI</i> AF                    | CCCCTCGAGGTCGACGGTATACATGATGTGGA<br>GCGCGTC                                  | Up stream F<br>primer of<br><i>PIYYI</i> /<br>Complement<br>F primer                                                           |
| <i>PIYYI</i> AR                    | GCTTTTTTCATGGTGGCGTTGAGGTATCC                                                | Up stream R<br>primer of<br><i>PIYYI</i>                                                                                       |
| <i>PIYYI</i> hphF                  | CAACGCCACCATGAAAAAGCCTGAACTCAC                                               | 1) Donor<br>DNA F<br>primer. 2)F<br>prier to<br>verifying<br>whether<br>donar DNA<br><i>HPH</i> and<br>down stream<br>sequence |

|                    |                                               |                                                                                                                                                                 |
|--------------------|-----------------------------------------------|-----------------------------------------------------------------------------------------------------------------------------------------------------------------|
|                    |                                               | can be amplified                                                                                                                                                |
| <i>PIYYI</i> /hphR | TCCTACACGCCTATTCCTTTGCCCTCGG                  | Donor DNA R primer                                                                                                                                              |
| <i>PIYYI</i> /BF   | AAAGGAATAGGCGTGTAGGATATTGAGTATTT<br>C         | Down stream F primer of <i>PIYYI</i>                                                                                                                            |
| <i>PIYYI</i> /BR   | CGGCCGCTCTAGAACTAGTGCATACATGTACA<br>TGAATGGTG | 1)Down stream R primer of <i>PIYYI</i> . 2)F primer to verifying whether donar DNA <i>HPH</i> and down stream sequence can be amplified. 3)Compleme nt F primer |
| A1-F primer        | CTCGACCACCACATCAAGATCCACA                     | verifying whether <i>PIYYI</i> can be amplified                                                                                                                 |
| A1-R primer        | TGAGATACACCCGCCACGCTG                         |                                                                                                                                                                 |
